# Supplementary material
Source: publisher figshare collection journal article supplement (https://scielo.figshare.com/articles/dataset/_/6151466)
Supplement: Supplementary file 1 [file Table_1.xls]

## Sheet: Table_1
<b>Host plant Family/Species</b>	<b>Organ</b>	<b>Side</b>	<b>Color</b>	<b>Shape</b>	<b>Pubescense</b>	<b>Group</b>	<b>Chambers</b>	<b>Gall maker</b>	<b>Associated fauna</b>	<b>Figures</b>	<b>Vegetation</b>
<strong>ANNONACEAE</strong>
<em>Annona</em> sp.	Leaf	Adaxial	Green	Globoid	Yes	Isolated	1	Not identified	Not identified	2A	Cerrado
<em>Duguetia furfuracea</em> (A.St.-Hil.) Saff.	Leaf	Adaxial	Green	Globoid	Yes	Grouped	1	Bruggmanniella sp.*	Not identified	2B	Cerrado
<strong>ANACARDIACEAE</strong>
<em>Anacardium humile</em> A.St.-Hil.	Leaf	Adaxial/Abaxial	Green	Globoid	No	Grouped	1	Cecidomyiidae**	Not identified	2C	Cerrado
<strong>BIGNONIACEAE</strong>
Bignoniaceae Indet.	Stem	Abaxial	Brown	Globoid	No	Isolated	Various	Not identified	Not identified	2D	Rupestrian field
<strong>CONVOVULACEAE</strong>
<em>Ipomoea</em> sp.	Leaf	Adaxial	Yellow	Globoid	Yes	Isolated	1	Not identified	Not identified	2E	Rupestrian field
<strong>COMBRETACEAE</strong>
<em>Combretum leprosum</em> Mart.	Leaf	Adaxial/Abaxial	Green/Yellow	Globoid	No	Grouped	1	Cecidomyiidae**	Lepidoptera**	2F	Cerrado
<em>Terminalia fagifolia</em> Mart.	Leaf	Abaxial	Brown	Conical	Yes	Isolated	1	Not identified	Not identified	2G	Cerrado
<strong>DILLENIACEAE</strong>
<em>Davilla rugosa</em> Poir.	Fruit	Adaxial	Brown	Globoid	No	Grouped	1	Not identified	Not identified	2H	Cerrado
<strong>EBENACEAE</strong>
<em>Dyosprus</em> sp.	Leaf	Adaxial	Green	Lenticular	No	Grouped	1	Not identified	Not identified	2I	Cerrado
<strong>EUPHORBIACEAE</strong>
<em>Croton</em> sp. 1	Leaf	Adaxial	Green	Cylindrical	Yes	Isolated	1	Not identified	Hymenoptera**	2J	Cerrado
<em>Croton</em> sp. 2	Leaf	Abaxial	Brown	Globoid	No	Grouped	Various	Not identified	Not identified	2L	Cerrado
<strong>LAURACEAE</strong>
+<em>Ocotea velutina</em> (Mart. ex Ness) Rohwer	Leaf	Adaxial/Abaxial	Green/Brown	Globoid	Yes	Grouped	1	Not identified	Not identified	2M	Cerrado
<strong>LEGUMINOSAE</strong>
Leguminosae Indet. 1	Leaf	Adaxial	Brown	Globoid	No	Isolated	1	Cecidomyiidae**	Not identified	2N	Cerrado
Leguminosae Indet. 2	Leaf	Adaxial	Green	Marginal roll	No	Isolated	1	Cecidomyiidae**	Not identified	2O	Rupestrian field
<strong>LEGUMINOSAE-CAESALPINIOIDEAE</strong>
<em>Mimosa gemmulata</em> Barneby	Leaf	Adaxial	Green	Marginal roll	No	Isolated	1	Cecidomyiidae**	Not identified	2P	Cerrado
	Leaf	Adaxial	Red	Globoid	Yes	Isolated	1	Cecidomyiidae**	Not identified	2Q	Cerrado
<strong>LEGUMINOSAE-DETARIOIDEAE</strong>
<em>Copaifera langsdorffii</em> Desf.	Leaf	Adaxial/Abaxial	Green	Lenticular	No	Grouped	1	Cecidomyiidae**	Not identified	3A	Cerrado
<em>Copaifera sabulicola</em> J.A.S. Costa &amp; L.P. Queiroz	Leaf	Adaxial	Brown	Globoid	Yes	Isolated	1	Not identified	Not identified	3B	Cerrado
	Stem	Abaxial	Brown	Globoid	No	Grouped	Various	Not identified	Not identified	3C	Cerrado
	Bud	Abaxial	Brown	Amorphous	No	Isolated	1	Not identified	Not identified	3D	Cerrado
	Leaf	Adaxial	Green	Globoid	Yes	Isolated	1	Not identified	Not identified	3E	Cerrado
	Stem	Abaxial	Brown	Globoid	No	Isolated	Various	Not identified	Not identified	3F	Cerrado
<strong>MALPIGHIACEAE</strong>
<em>Byrsonima</em> cf. <em>guilleminiana</em> A. Juss.	Leaf	Abaxial	Green	Conical	Yes	Isolated	1	Cecidomyiidae*	Not identified	3G	Cerrado
	Stem	–	Brown	Fusiform	No	Isolated	Various	Not identified	Not identified	3H	Cerrado
Malphighiaceae Indet.1	Stem	–	Brown	Globoid	Yes	Isolated	1	Not identified	Hymenoptera**	3I	Cerrado
Malphighiaceae Indet. 2	Leaf	Adaxial	White	Globoid	Yes	Grouped	1	Not identified	Not identified	3J	Cerrado
Malphighiaceae Indet. 3	Leaf	Adaxial/Abaxial	Brown	Globoid	Yes	Isolated	Various	Cecidomyiidae**	Hymenoptera**	3L	Cerrado
Malphighiaceae Indet. 4	Leaf	Abaxial	White	Globoid	Yes	Isolated	1	Not identified	Hymenoptera**	3M	Cerrado
Malphighiaceae Indet. 5	Leaf	Adaxial	Green	Globoid	Yes	Isolated	1	Not identified	Not identified	3N	Cerrado
Malphighiaceae Indet. 6	Leaf	Adaxial	Green	Globoid	No	Isolated	1	Not identified	Not identified	3O	Cerrado
<strong>MALVACEAE</strong>
<em>Luehea divaricata</em> Mart.	Leaf	Adaxial	Brown	Globoid	Yes	Isolated	1	Not identified	Not identified	3P	Cerrado
<strong>MELASTOMATACEAE</strong>
<em>Miconia alborufescens</em> Naudin	Leaf	Adaxial	White	Globoid	Yes	Grouped	1	Not identified	Not identified	3Q	Cerrado
<strong>MYRTACEAE</strong>
<em>Campomanesia</em> sp.	Leaf	Adaxial	Green	Lenticular	No	Isolated	1	Not identified	Hymenoptera**	4A	Cerrado
<em>Eugenia punicifolia</em> (Kunth) DC.	Stem	-	Brown	Globoid	No	Isolated	1	Not identified	Hymenoptera**	4B	Cerrado
<em>Eugenia</em> sp.	Leaf	Adaxial	Green	Lenticular	No	Isolated	1	Not identified	Hymenoptera**	4C	Cerrado
<em>Myrciaria cuspidata</em> O. Berg	Leaf	Abaxial	Red	Globoid	Yes	Grouped	1	Cecidomyiidae*	Not identified	4D	Cerrado
<strong>NYCTAGINACEAE</strong>
<em>Guapira opposita</em> (Vell.) Reitz	Stem	Abaxial	Brown	Globoid	No	Isolated	Various	Cecidomyiidae*	Hymenoptera*	4E	Rupestrian field
	Leaf	Adaxial	Brown	Globoid	No	Isolated	1	Diptera*	Not identified	4F	Rupestrian field
<strong>OCHNACEAE</strong>
<em>Ouratea</em> sp.	Leaf	Adaxial	Green	Lenticular	No	Isolated	1	Cecidomyiidae**	Not identified	4G	Cerrado
	Leaf	Adaxial/Abaxial	Green	Globoid	No	Grouped	Various	Not identified	Not identified	4H	Cerrado
	Leaf	Adaxial	Green	Lenticular	No	Isolated	1	Not identified	Not identified	4I	Cerrado
<strong>PROTEACEAE</strong>
<em>Roupala montana</em> Aubl.	Leaf	Abaxial	Green	Marginal roll	No	Isolated	1	Not identified	Not identified	4J	Rupestrian field
	Leaf	Adaxial	Green	Lenticular	No	Isolated	1	Not identified	Not identified	4L	Rupestrian field
<strong>RUTACEAE</strong>
<em>Galipea</em> sp.1	Leaf	Adaxial	Green	Amorphous	No	Grouped	1	Not identified	Not identified	4M	Cerrado
<strong>SAPINDACEAE</strong>
<em>Serjania paludosa</em> Cambess.	Leaf	Adaxial	Green	Globoid	No	Isolated	1	Not identified	Not identified	4N	Cerrado
<strong>TRIGONEACEAE</strong>
<em>Trigonia nivea</em> Cambess.	Leaf	Abaxial	White	Globoid	Yes	Grouped	1	Cecidomyiidae*	Not identified	4O	Cerrado
<strong>VERBENACEAE</strong>
<em>Lippia cf. alba</em> (Mill.) N.E. Br. ex Britton &amp; P. Wilson	Leaf	Adaxial	Green	Globoid	Yes	Isolated	1	Cecidomyiidae**	Hymenoptera**	4P	Rupestrian field
<em>Lippia microphylla</em> Cham.	Leaf	Abaxial	Green/Brown	Globoid	Yes	Isolated	1	Cecidomyiidae**	Not identified	4Q	Rupestrian field
