# Supplementary material
Source: publisher figshare collection journal article supplement (https://scielo.figshare.com/articles/dataset/_/6151466)
Supplement: Supplementary file 2 [file Table_2.xls]

## Sheet: Table_2
<b>Locality</b>	<b>Biomes</b>	<b>Richest families</b>	<b>Number of morphotypes</b>	<b>Mean of morphotypes</b>	<b>Richest genera</b>	<b>Richest species</b>
Brejinho das ametistas, Caetité, BA (the present study)	Rupestrian fieldsCerrado	Leguminosae (10),Malpighiaceae (8)e Myrtaceae (4)	48	1.3	<em>Copaifera</em> L. (5)<em>Mimosa</em> L. (2)<em>Byrsonima</em> Rich. ex Kunth (2)	<em>Copaifera langsdorffii</em> Desf.(5)
Serra de Caetité, BA (Nogueira et al. 2016)	Cerrado-Caatinga	Leguminosae (22)Malpighiaceae (10)	49	3.5	<em>Copaifera</em> (10)<em>Bauhinia</em> L. (6)<em>Mimosa</em> (4)	<em>Copaifera langsdorffii</em> Desf.(9)<em>Bauhinia acuruana</em> Moric. (5)
Goiânia, GO (Araújo et al. 2014)	Cerrado	Myrtaceae (17)Leguminosae (14)	97	1.8	<em>Myrcia</em> DC. (10)<em>Qualea</em> Aubl. (8)<em>Byrsonima</em> (6)<em>Andira</em> Lam. (4)	<em>Andira cujabensis</em> Benth. (4)<em>Myrcia guianensis</em> (Aubl.) DC. (4)<em>Byrsonima coccolobifolia</em> Kunth (3)
Serra do Cabral, MG (Coelho et al. 2013b)	Cerrado	Asteraceae (12)Malpighiaceae (9)Fabaceae (4)	47	1.2	<em>Byrsonima</em> (6)<em>Lessingianthus</em> H. Rob. (4)	<em>Byrsonima guilleminiana</em> A. Juss. (3)
Caldas Novas, GO (Santos et al. 2012)	Cerrado	Fabaceae (14),Vochysiaceae (8)e Malpighiaceae (5)	56	1.6	<em>Qualea</em> Aubl. (8)<em>Andira</em> (6)	<em>Andira paniculata</em> Benth. (5)<em>Caryocar brasiliense</em> Cambess. (3)<em>Qualea parviflora</em> Mart. (3)<em>Qualea grandiflora</em> Mart. (3)
Cadeia do Espinhaço, MG (Carneiro et al. 2009)	Rupestrian fields	Asteraceae (47)Melastomataceae (26)Malpighiaceae (22)Leguminosae (21)	241	1.7	<em>Baccharis</em> L. (39)<em>Byrsonima</em> (17)<em>Microlicia</em> D.Don (10)<em>Lessingianthus Lychnophora</em> Mart. (9)	<em>Baccharis pseudomyriocephala</em> Teodoro Luis (10)<em>Byrsonima coccolobifolia</em> Kunth (8)
Serra do Cipó, MG (Coelho et al. 2009)	Rupestrian fields	Leguminosae (22)Myrtaceae (11)Asteraceae (8)	92	1.8	<em>Bauhinia</em> (10)<em>Myrcia</em> (7)<em>Baccharis</em> (6)<em>Celtis</em> L. (6)<em>Serjania</em> Mill. (6)	<em>Baccharis dracunculifolia</em> DC. (5)<em>Celtis brasiliensis</em> (Gardner) Planch. (5)
Serra de São José, Tiradentes, MG (Maia & Fernandes, 2004)	Rupestrian fields - Cerrado	Leguminosae (20)Myrtaceae (18)Asteraceae (16)Melastomataceae (14)	137	2.9	<em>Protium</em> Burm. f. (7)<em>Baccharis</em> (6)<em>Copaifera</em> (6)<em>Myrcia</em> (6)	<em>Protium heptaphyllum</em> (Aubl.) Marchand (7)<em>Copaifera langsdorffii</em> (6)<em>Myrcia</em> spp. (6)<em>Croton floribundus</em> Spreng. (5)<em>Miconia theaezans</em> (Bonpl.) Cogn. (5)
